# Supplementary material for: Construction of a novel Cu2(OH)3F/g-C3N4 heterojunction as a high-activity Fenton-like catalyst driven by visible light
Source: Royal Society of Chemistry journal article supplement (doi:10.1039/d1nj02091a), 2021-01-01
Supplement: d1nj02091a1.pdf [file d1nj02091a1.pdf]

## Supplementary Materials

### **Construction of a novel $\text{Cu}_2(\text{OH})_3\text{F}/\text{g-C}_3\text{N}_4$ heterojunction as a high-activity Fenton-like photocatalyst driven by visible light**

*Lifen Wang<sup>1</sup>, Yinjun Lin<sup>1</sup>, Wenting Guo<sup>1</sup>, Yuanyuan Yang<sup>1</sup>, Ruiqin Zhang<sup>2</sup>, Yunpu Zhai<sup>1</sup> and Yonggang Liu<sup>1,2\*</sup>*

<sup>1</sup>Green Catalysis Center, College of Chemistry, Zhengzhou University, Zhengzhou, Henan 450001, PR China

<sup>2</sup>School of Ecology and Environment, Zhengzhou University, Zhengzhou, Henan 450001, PR China

\*Corresponding authors: [ygliu@zzu.edu.cn](mailto:ygliu@zzu.edu.cn) (Y. G. Liu)

**Table S1.** Comparison of the degradation of organic pollutants by other copper-based or and CN-based catalysts using photo-assisted Fenton-like effect.

| Catalyst                                                             | Dosage<br>(mg) | Target<br>pollutant | C <sub>0</sub><br>(mg/L) | V<br>(mL) | Reaction<br>time(min) | Catalytic<br>cycles | Declined<br>activity | Ref.     |
|----------------------------------------------------------------------|----------------|---------------------|--------------------------|-----------|-----------------------|---------------------|----------------------|----------|
| Fe <sub>3</sub> O <sub>4</sub> /C/Cu <sub>2</sub> O                  | 20             | MB                  | 100                      | 50        | 60                    | 3                   | 3.2%                 | 1        |
| Cu/Fe <sub>3</sub> O <sub>4</sub> @CRC                               | 50             | MB                  | 200                      | 50        | 60                    | 5                   | 5%                   | 2        |
| CuFe <sub>2</sub> O <sub>4</sub> /Fe <sub>2</sub> O <sub>3</sub>     | 250            | MB                  | 50                       | 250       | 270                   | 4                   | little               | 3        |
| CuCr <sub>2</sub> O <sub>4</sub> /CeO <sub>2</sub>                   | 50             | RhB                 | 20                       | 60        | 16                    | 3                   | 7%                   | 4        |
| Cu-C-CN                                                              | 20             | MB                  | 10                       | 50        | 150                   | 5                   | little               | 5        |
| CuO/LaFeO <sub>3</sub>                                               | 15             | RhB                 | 6                        | 100       | 180                   | 5                   | little               | 6        |
| BW/BF/g-C <sub>3</sub> N <sub>4</sub>                                | 10             | RhB                 | 10                       | 100       | 90                    | 4                   | little               | 7        |
| LFO-15Cu                                                             | 100            | MO                  | 10                       | 100       | 60                    | 4                   | 4.4%                 | 8        |
| g-C <sub>3</sub> N <sub>4</sub> /NH <sub>2</sub> -Iron               | 50             | MB                  | 30                       | 50        | 120                   | 4                   | little               | 9        |
| Cu-CNK-OH                                                            | 20             | RhB                 | 10                       | 50        | 20                    | 5                   | 6.3%                 | 10       |
| Cu <sub>2</sub> (OH)PO <sub>4</sub> /g-C <sub>3</sub> N <sub>4</sub> | 20             | RhB                 | 10                       | 50        | 40                    | 5                   | little               | 11       |
| ZnFe <sub>2</sub> O <sub>4</sub> /g-C <sub>3</sub> N <sub>4</sub>    | 25             | MB                  | 20                       | 50        | 60                    | 5                   | ≈5%                  | 12       |
| CuS/g-C <sub>3</sub> N <sub>4</sub>                                  | 40             | RhB                 | 30                       | 100       | 60                    | 3                   | little               | 13       |
| Fe-doped g-C <sub>3</sub> N <sub>4</sub>                             | 20             | RhB                 | 10                       | 100       | 45                    | 5                   | 5.7%                 | 14       |
| Cu <sub>2</sub> (OH) <sub>3</sub> F/g-C <sub>3</sub> N <sub>4</sub>  | 10             | RhB                 | 20                       | 50        | 25                    | 5                   | ≈1%                  | Our work |

## References

1. F. Chai, K. Li, C. Song and X. Guo, *J Colloid Interface Sci*, 2016, **475**, 119-125.
2. V. T. Le, V. D. Doan, V. A. Tran, H. S. Le, D. L. Tran, T. M. Pham, T. H. Tran and H. T. Nguyen, *Materials Research Bulletin*, 2020, **129**.
3. E. d. N. Silva, I. L. O. Brasileiro, V. S. Madeira, B. A. de Farias, M. L. A. Ramalho, E. Rodríguez-Aguado and E. Rodríguez-Castellón, *Journal of Environmental Chemical Engineering*, 2020, **8**.
4. K. Ghorai, A. Panda, M. Bhattacharjee, D. Mandal, A. Hossain, P. Bera, M. M. Seikh and A. Gayen, *Applied Surface Science*, 2021, **536**.
5. L. Wang, Y. Zhu, D. Yang, L. Zhao, H. Ding and Z. Wang, *Applied Surface Science*, 2019, **488**, 728-738.
6. Y. Soltanabadi, M. Jourshabani and Z. Shariatinia, *Separation and Purification Technology*, 2018, **202**, 227-241.
7. T. Wang, Y. Bai, W. Si, W. Mao, Y. Gao and S. Liu, *Journal of Photochemistry and*

*Photobiology A: Chemistry*, 2021, **404**.

8. T. T. N. Phan, A. N. Nikoloski, P. A. Bahri and D. Li, *Journal of Industrial and Engineering Chemistry*, 2018, **61**, 53-64.
9. X. Li, Y. Pi, L. Wu, Q. Xia, J. Wu, Z. Li and J. Xiao, *Applied Catalysis B: Environmental*, 2017, **202**, 653-663.
10. Q. Dong, Y. Chen, L. Wang, S. Ai and H. Ding, *Applied Surface Science*, 2017, **426**, 1133-1140.
11. C. Chen, Y. Zhou, N. Wang, L. Cheng and H. Ding, *RSC Advances*, 2015, **5**, 95523-95531.
12. B. Palanivel, S. d. Mudisoodum perumal, T. Maiyalagan, V. Jayarman, C. Ayyappan and M. Alagiri, *Applied Surface Science*, 2019, **498**.
13. Y. Ma, J. Zhang, Y. Wang, Q. Chen, Z. Feng and T. Sun, *J Adv Res*, 2019, **16**, 135-143.
14. S. Ji, Y. Yang, Z. Zhou, X. Li and Y. Liu, *Journal of Water Process Engineering*, 2021, **40**.

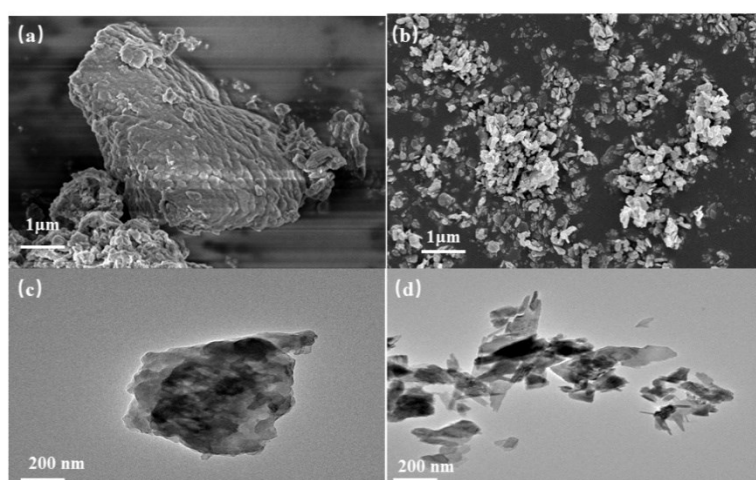

Fig. S1. SEM images of (a) pure g-C<sub>3</sub>N<sub>4</sub>, (b) pure Cu<sub>2</sub>(OH)<sub>3</sub>F. TEM images of (a) pure g-C<sub>3</sub>N<sub>4</sub>, (b) pure Cu<sub>2</sub>(OH)<sub>3</sub>F.

EDS 分层图像 1

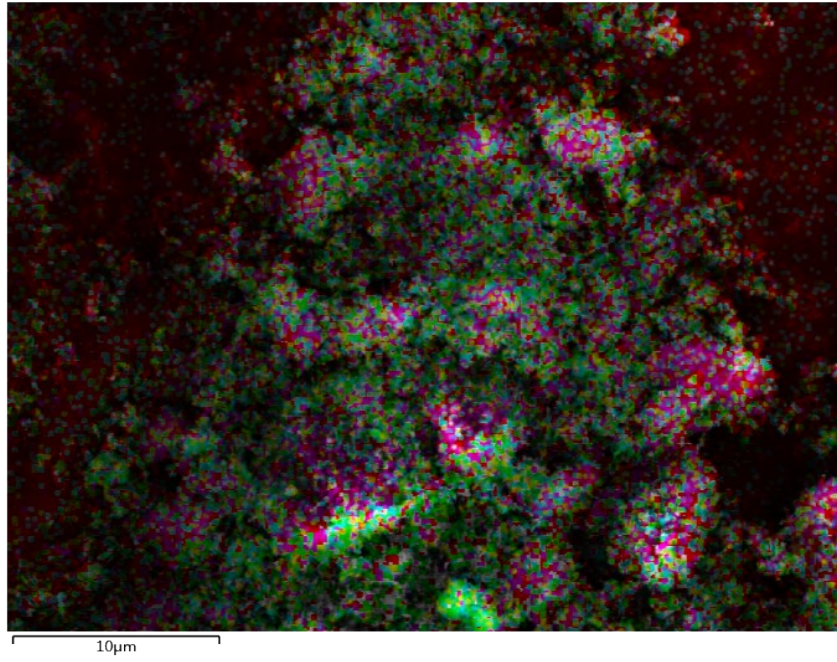

Fig.S2. element mappings of CFO/CN-40

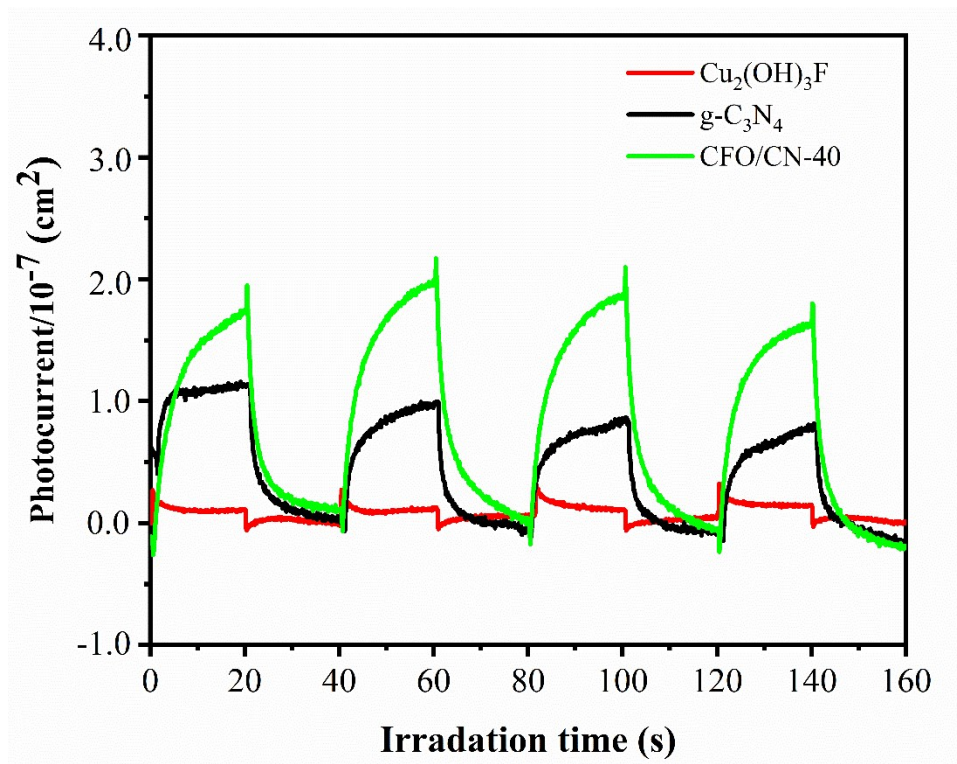

Fig.S3. Transient photocurrent response of the  $\text{Cu}_2(\text{OH})_3\text{F}$ ,  $\text{g-C}_3\text{N}_4$  and CFO/CN-40.

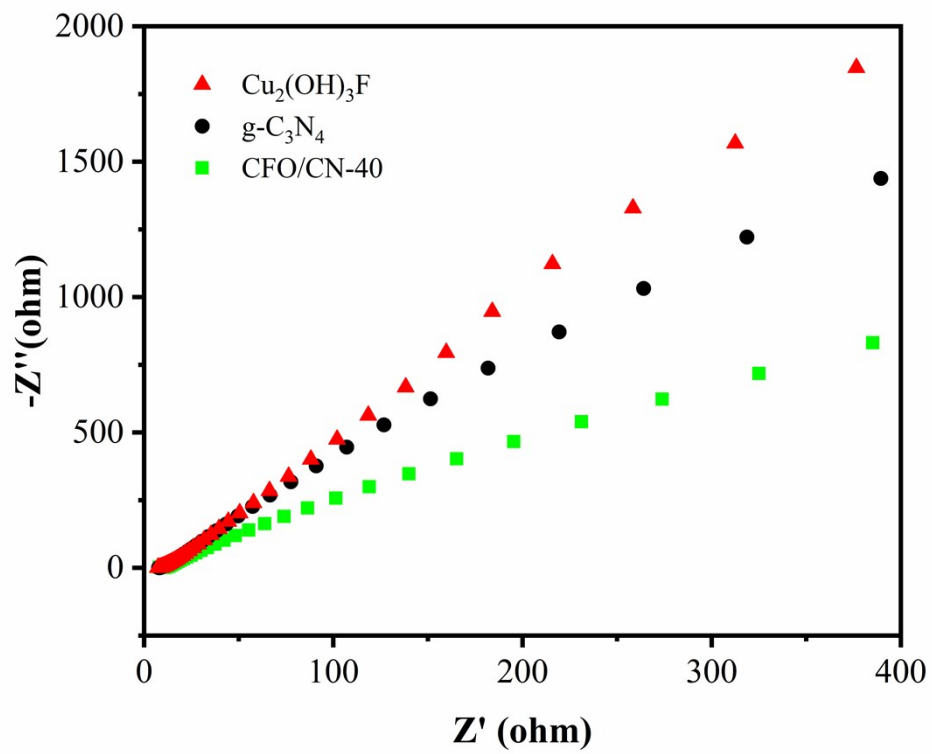

Fig.S4. EIS Nyquist plots of the Cu<sub>2</sub>(OH)<sub>3</sub>F, g-C<sub>3</sub>N<sub>4</sub> and CFO/CN-40.
